# Supplementary material for: Patient-centered discharge summaries to support safety and individual health literacy: a double-blind randomized controlled trial in Austria
Source: PubMed Central journal article supplement (PMC11234775; doi:10.1186/s12913-024-11183-w), 2024-07-09

University Hospital of Graz

Evaluation is carried out by the Department für Quality-and Riskmanagement

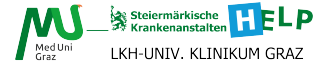

Mark as shown:      Please use a ball-point pen or a thin felt tip. This form will be processed automatically.  
 Correction:      Please follow the examples shown on the left hand side to help optimize the reading results.

## 1. General Information

Dear Sir or Madam

This survey analyses the content and structure of the current medical discharge summary. We are interested in your opinion. Your answers will contribute to the further development of the discharge summary. Participation in this research project is voluntary. Participants can withdraw at any time, even after the beginning of the survey, and do not have to give any reasons for doing so. Refusal to participate or early withdrawal will have no negative consequences for you. No personal data will be requested. It is therefore not possible to draw any conclusions about you as an individual. If you have any questions, please contact PD. Dr Gerald Sendlhofer (gerald.sendlhofer@klinikum-graz.at).

Thank you very much!

- 1.1 Your sex:  Female  Male  Diverse
- 1.2 Where do you work?  In a hospital  in general practice
- 1.3 If you work in a hospital, what position do you have? (multiple selections possible)  junior physician  ward physician  assistant physician  specialist physician  senior physician  leading function
- 1.4 If you work in the general practice setting, you are...  a specialist in general medicine  specialist for other subjects
- 1.5 How long have you been working in the healthcare sector?  <5 years  5 - 10 years  11-15 years  16-20 years  >20 years

## 2. Structure of the discharge summary

|                                                                           |                          |                          |                          |
|---------------------------------------------------------------------------|--------------------------|--------------------------|--------------------------|
|                                                                           | <i>Totally agree</i>     |                          | <i>disagree at all</i>   |
|                                                                           | 1                        | 2                        | 3                        |
|                                                                           | 4                        | 5                        | 6                        |
| 2.1 Is the layout clear?                                                  | <input type="checkbox"/> | <input type="checkbox"/> | <input type="checkbox"/> |
| 2.2 Is the structure clear (logical)?                                     | <input type="checkbox"/> | <input type="checkbox"/> | <input type="checkbox"/> |
| 2.3 In your opinion, does the content of the document justify its length? | <input type="checkbox"/> | <input type="checkbox"/> | <input type="checkbox"/> |
| 2.4 Do you have any comments on the structure of the discharge summary?   |                          |                          |                          |

## 3. Content of the discharge summary

|                                           |                          |                          |                          |
|-------------------------------------------|--------------------------|--------------------------|--------------------------|
|                                           | <i>Totally agree</i>     |                          | <i>disagree at all</i>   |
|                                           | 1                        | 2                        | 3                        |
|                                           | 4                        | 5                        | 6                        |
| 3.1 Are the abbreviations used clear?     | <input type="checkbox"/> | <input type="checkbox"/> | <input type="checkbox"/> |
| 3.2 Are the abbreviations used explained? | <input type="checkbox"/> | <input type="checkbox"/> | <input type="checkbox"/> |

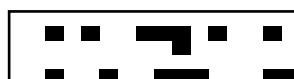

**3. Content of the discharge summary [Continue]**

|                                                                                                                                              | Totally agree            |                          |                          | disagree at all          |                          |                          |
|----------------------------------------------------------------------------------------------------------------------------------------------|--------------------------|--------------------------|--------------------------|--------------------------|--------------------------|--------------------------|
|                                                                                                                                              | 1                        | 2                        | 3                        | 4                        | 5                        | 6                        |
| 3.3 Is the discharge summary generally formulated in a way that you can understand?                                                          | <input type="checkbox"/> | <input type="checkbox"/> | <input type="checkbox"/> | <input type="checkbox"/> | <input type="checkbox"/> | <input type="checkbox"/> |
| 3.4 Is the chronological sequence of events during the inpatient stay presented coherently?                                                  | <input type="checkbox"/> | <input type="checkbox"/> | <input type="checkbox"/> | <input type="checkbox"/> | <input type="checkbox"/> | <input type="checkbox"/> |
| 3.5 Are the main and secondary diagnoses clearly stated?                                                                                     | <input type="checkbox"/> | <input type="checkbox"/> | <input type="checkbox"/> | <input type="checkbox"/> | <input type="checkbox"/> | <input type="checkbox"/> |
| 3.6 Are there comprehensible reasons for a treatment measure taken in the hospital?                                                          | <input type="checkbox"/> | <input type="checkbox"/> | <input type="checkbox"/> | <input type="checkbox"/> | <input type="checkbox"/> | <input type="checkbox"/> |
| 3.7 In your opinion, are the further therapy recommendations or rehabilitation goals presented in a comprehensible and comprehensive manner? | <input type="checkbox"/> | <input type="checkbox"/> | <input type="checkbox"/> | <input type="checkbox"/> | <input type="checkbox"/> | <input type="checkbox"/> |
| 3.8 Are the measures taken comprehensible and comprehensively presented?                                                                     | <input type="checkbox"/> | <input type="checkbox"/> | <input type="checkbox"/> | <input type="checkbox"/> | <input type="checkbox"/> | <input type="checkbox"/> |
| 3.9 Are the clinical conditions (including diagnoses) for the recommended medication adequately presented?                                   | <input type="checkbox"/> | <input type="checkbox"/> | <input type="checkbox"/> | <input type="checkbox"/> | <input type="checkbox"/> | <input type="checkbox"/> |
| 3.10 Is the recommended medication clearly described (name, active substances, dosage, method of administration...)?                         | <input type="checkbox"/> | <input type="checkbox"/> | <input type="checkbox"/> | <input type="checkbox"/> | <input type="checkbox"/> | <input type="checkbox"/> |
| 3.11 Can you derive the next necessary steps and measures/controls for further treatment/care from the discharge summary?                    | <input type="checkbox"/> | <input type="checkbox"/> | <input type="checkbox"/> | <input type="checkbox"/> | <input type="checkbox"/> | <input type="checkbox"/> |
| 3.12 Can you find information on possible allergies?                                                                                         | <input type="checkbox"/> | <input type="checkbox"/> | <input type="checkbox"/> | <input type="checkbox"/> | <input type="checkbox"/> | <input type="checkbox"/> |
| 3.13 Can you find the contact address of a physician for further enquiries?                                                                  | <input type="checkbox"/> | <input type="checkbox"/> | <input type="checkbox"/> | <input type="checkbox"/> | <input type="checkbox"/> | <input type="checkbox"/> |
| 3.14 Are you missing important information in the discharge summary or do you have any comments?                                             |                          |                          |                          |                          |                          |                          |

**4. Patient comprehensibility of the discharge summary**

|                                                                                                                    | Totally agree            |                          |                          | disagree at all          |                          |                          |
|--------------------------------------------------------------------------------------------------------------------|--------------------------|--------------------------|--------------------------|--------------------------|--------------------------|--------------------------|
|                                                                                                                    | 1                        | 2                        | 3                        | 4                        | 5                        | 6                        |
| 4.1 Would a medical layperson understand the contents of the discharge summary?                                    | <input type="checkbox"/> | <input type="checkbox"/> | <input type="checkbox"/> | <input type="checkbox"/> | <input type="checkbox"/> | <input type="checkbox"/> |
| 4.2 Would a medical layperson be able to understand the prescribed medication (application area)?                  | <input type="checkbox"/> | <input type="checkbox"/> | <input type="checkbox"/> | <input type="checkbox"/> | <input type="checkbox"/> | <input type="checkbox"/> |
| 4.3 Would a medical layperson be able to extract the next necessary measures and steps from the discharge summary? | <input type="checkbox"/> | <input type="checkbox"/> | <input type="checkbox"/> | <input type="checkbox"/> | <input type="checkbox"/> | <input type="checkbox"/> |
| 4.4 Is there anything else you would like to tell us about the discharge summary?                                  | <input type="checkbox"/> | <input type="checkbox"/> | <input type="checkbox"/> | <input type="checkbox"/> | <input type="checkbox"/> | <input type="checkbox"/> |

**Thank you for your co-operation!**

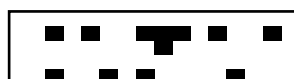

Supplement: 12913_2024_11183_MOESM2_ESM.pdf [file 12913_2024_11183_MOESM2_ESM.pdf]
